# Supplementary material for: Cisplatin resistance-related multi-omics differences and the establishment of machine learning models
Source: PubMed Central journal article supplement (PMC9004122; doi:10.1186/s12967-022-03372-0), 2022-04-11

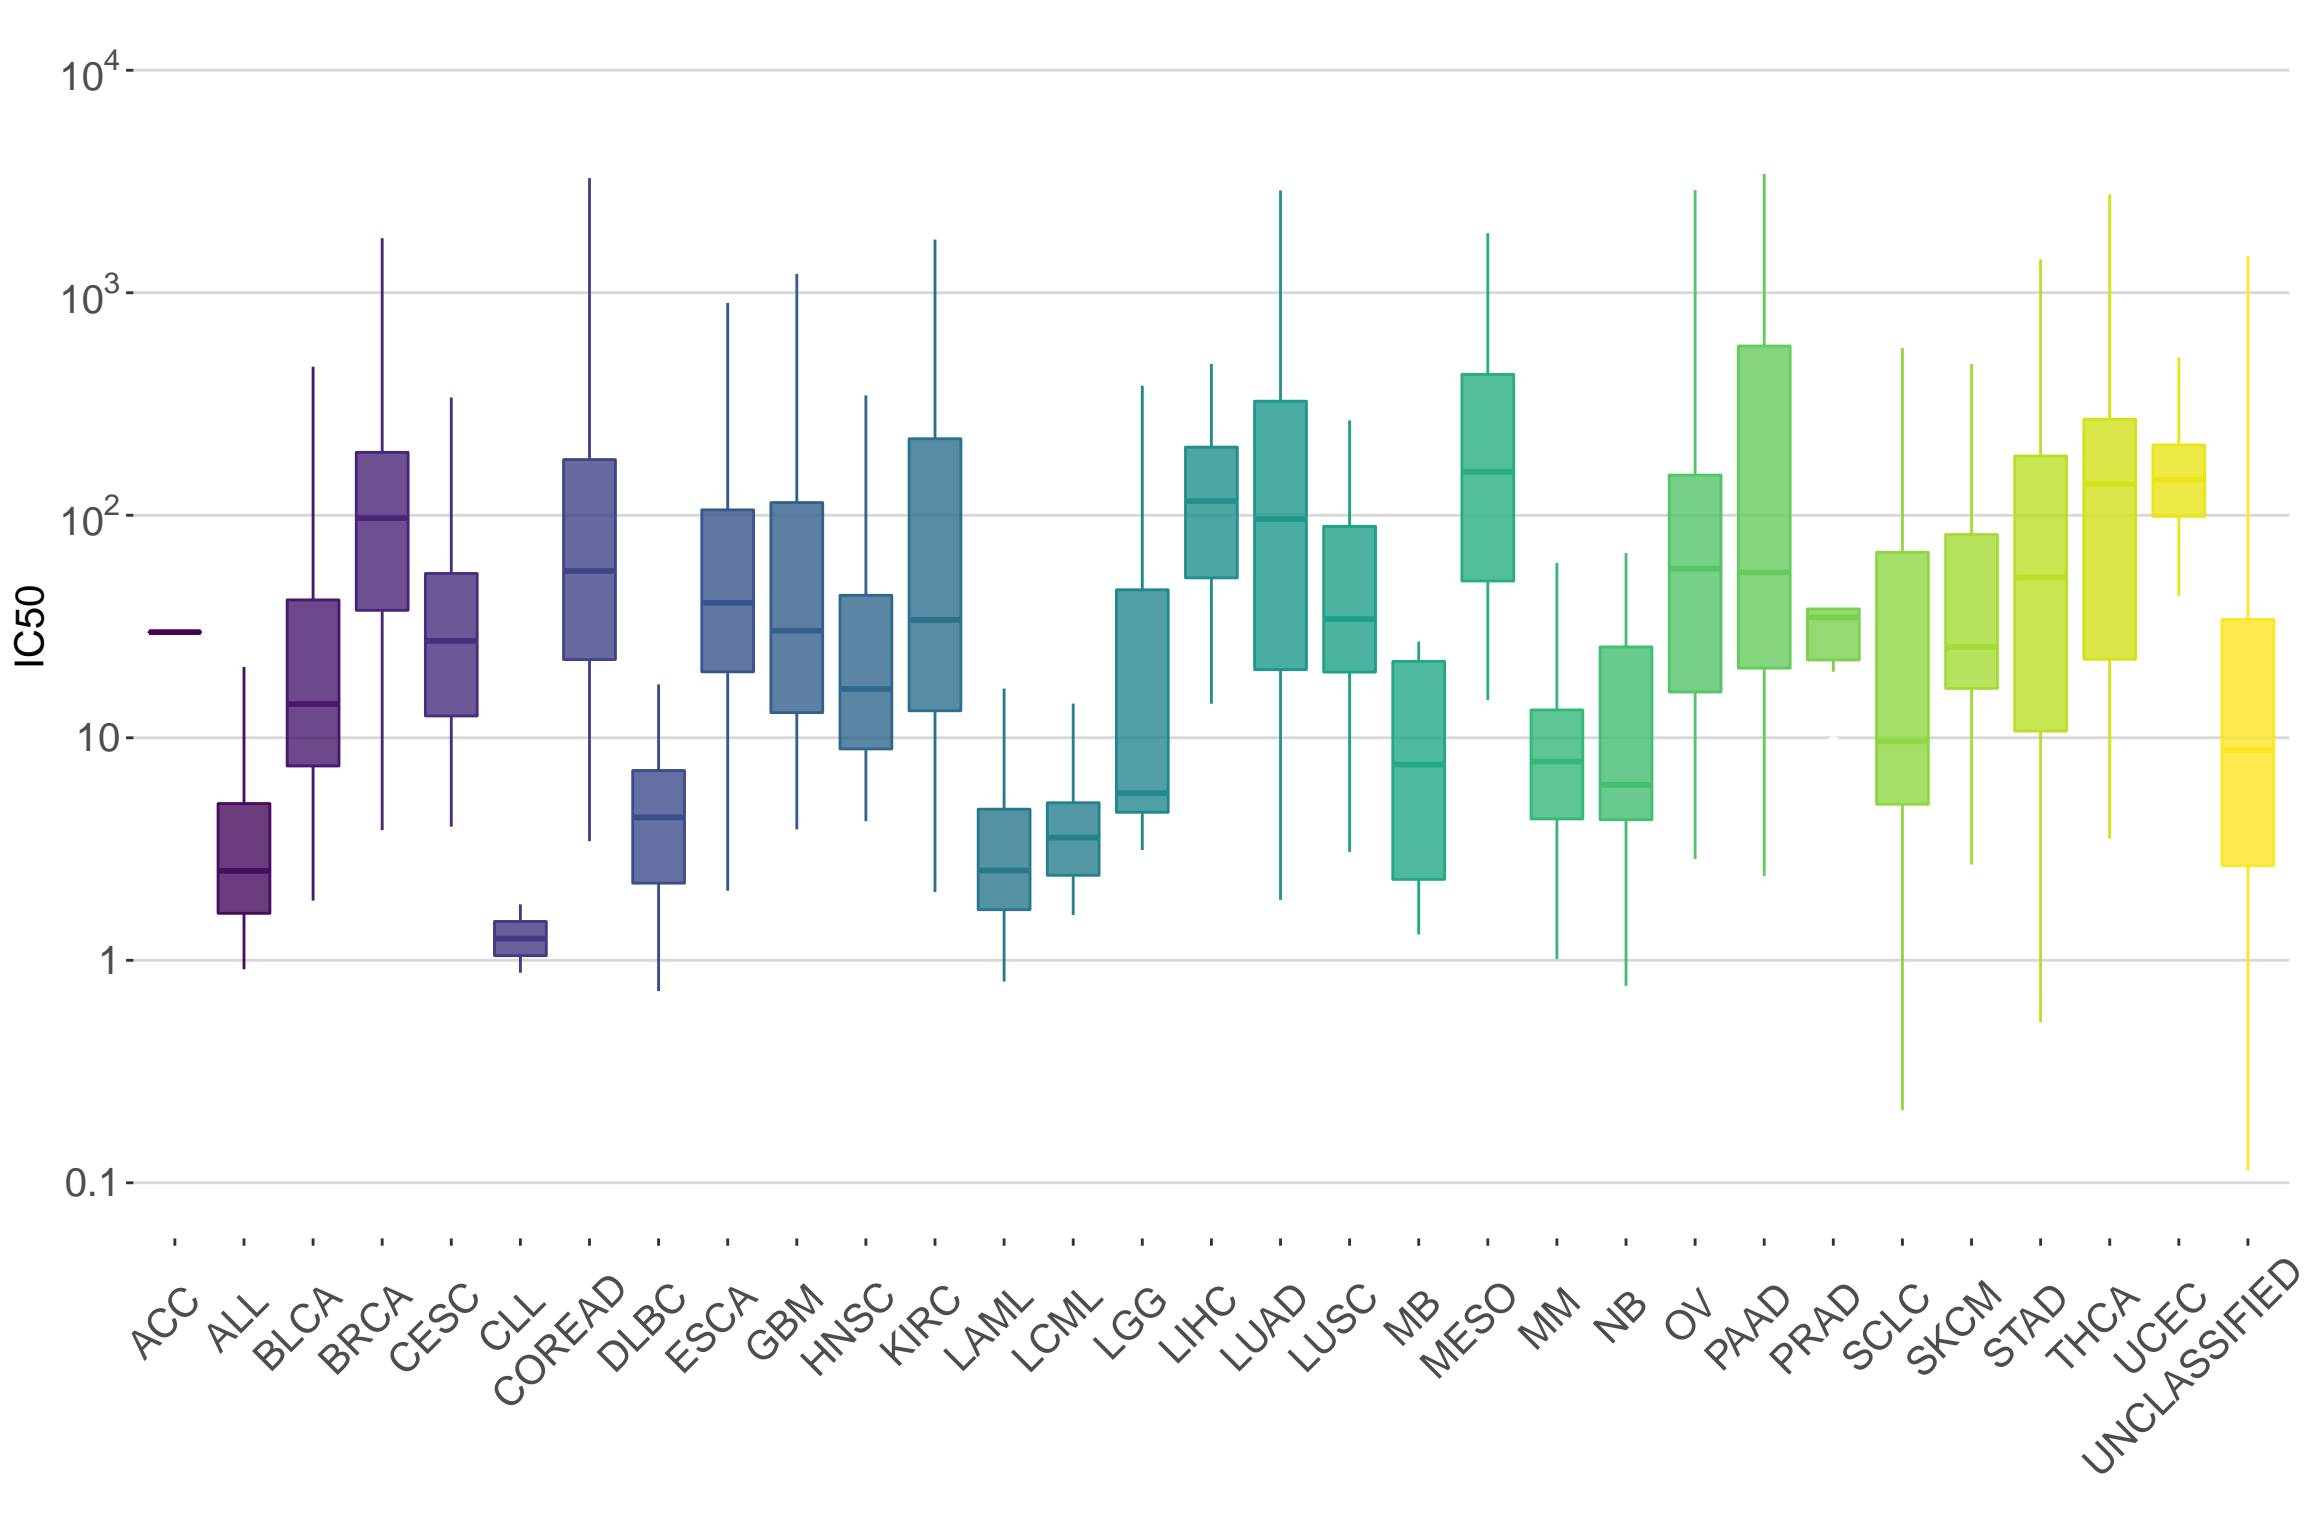

Supplement: 12967_2022_3372_MOESM1_ESM.pdf [file 12967_2022_3372_MOESM1_ESM.pdf]
