# Supplementary material for: Cisplatin resistance-related multi-omics differences and the establishment of machine learning models
Source: Springer Nature journal article supplement (doi:10.1186/s12967-022-03372-0), 2022-04-11

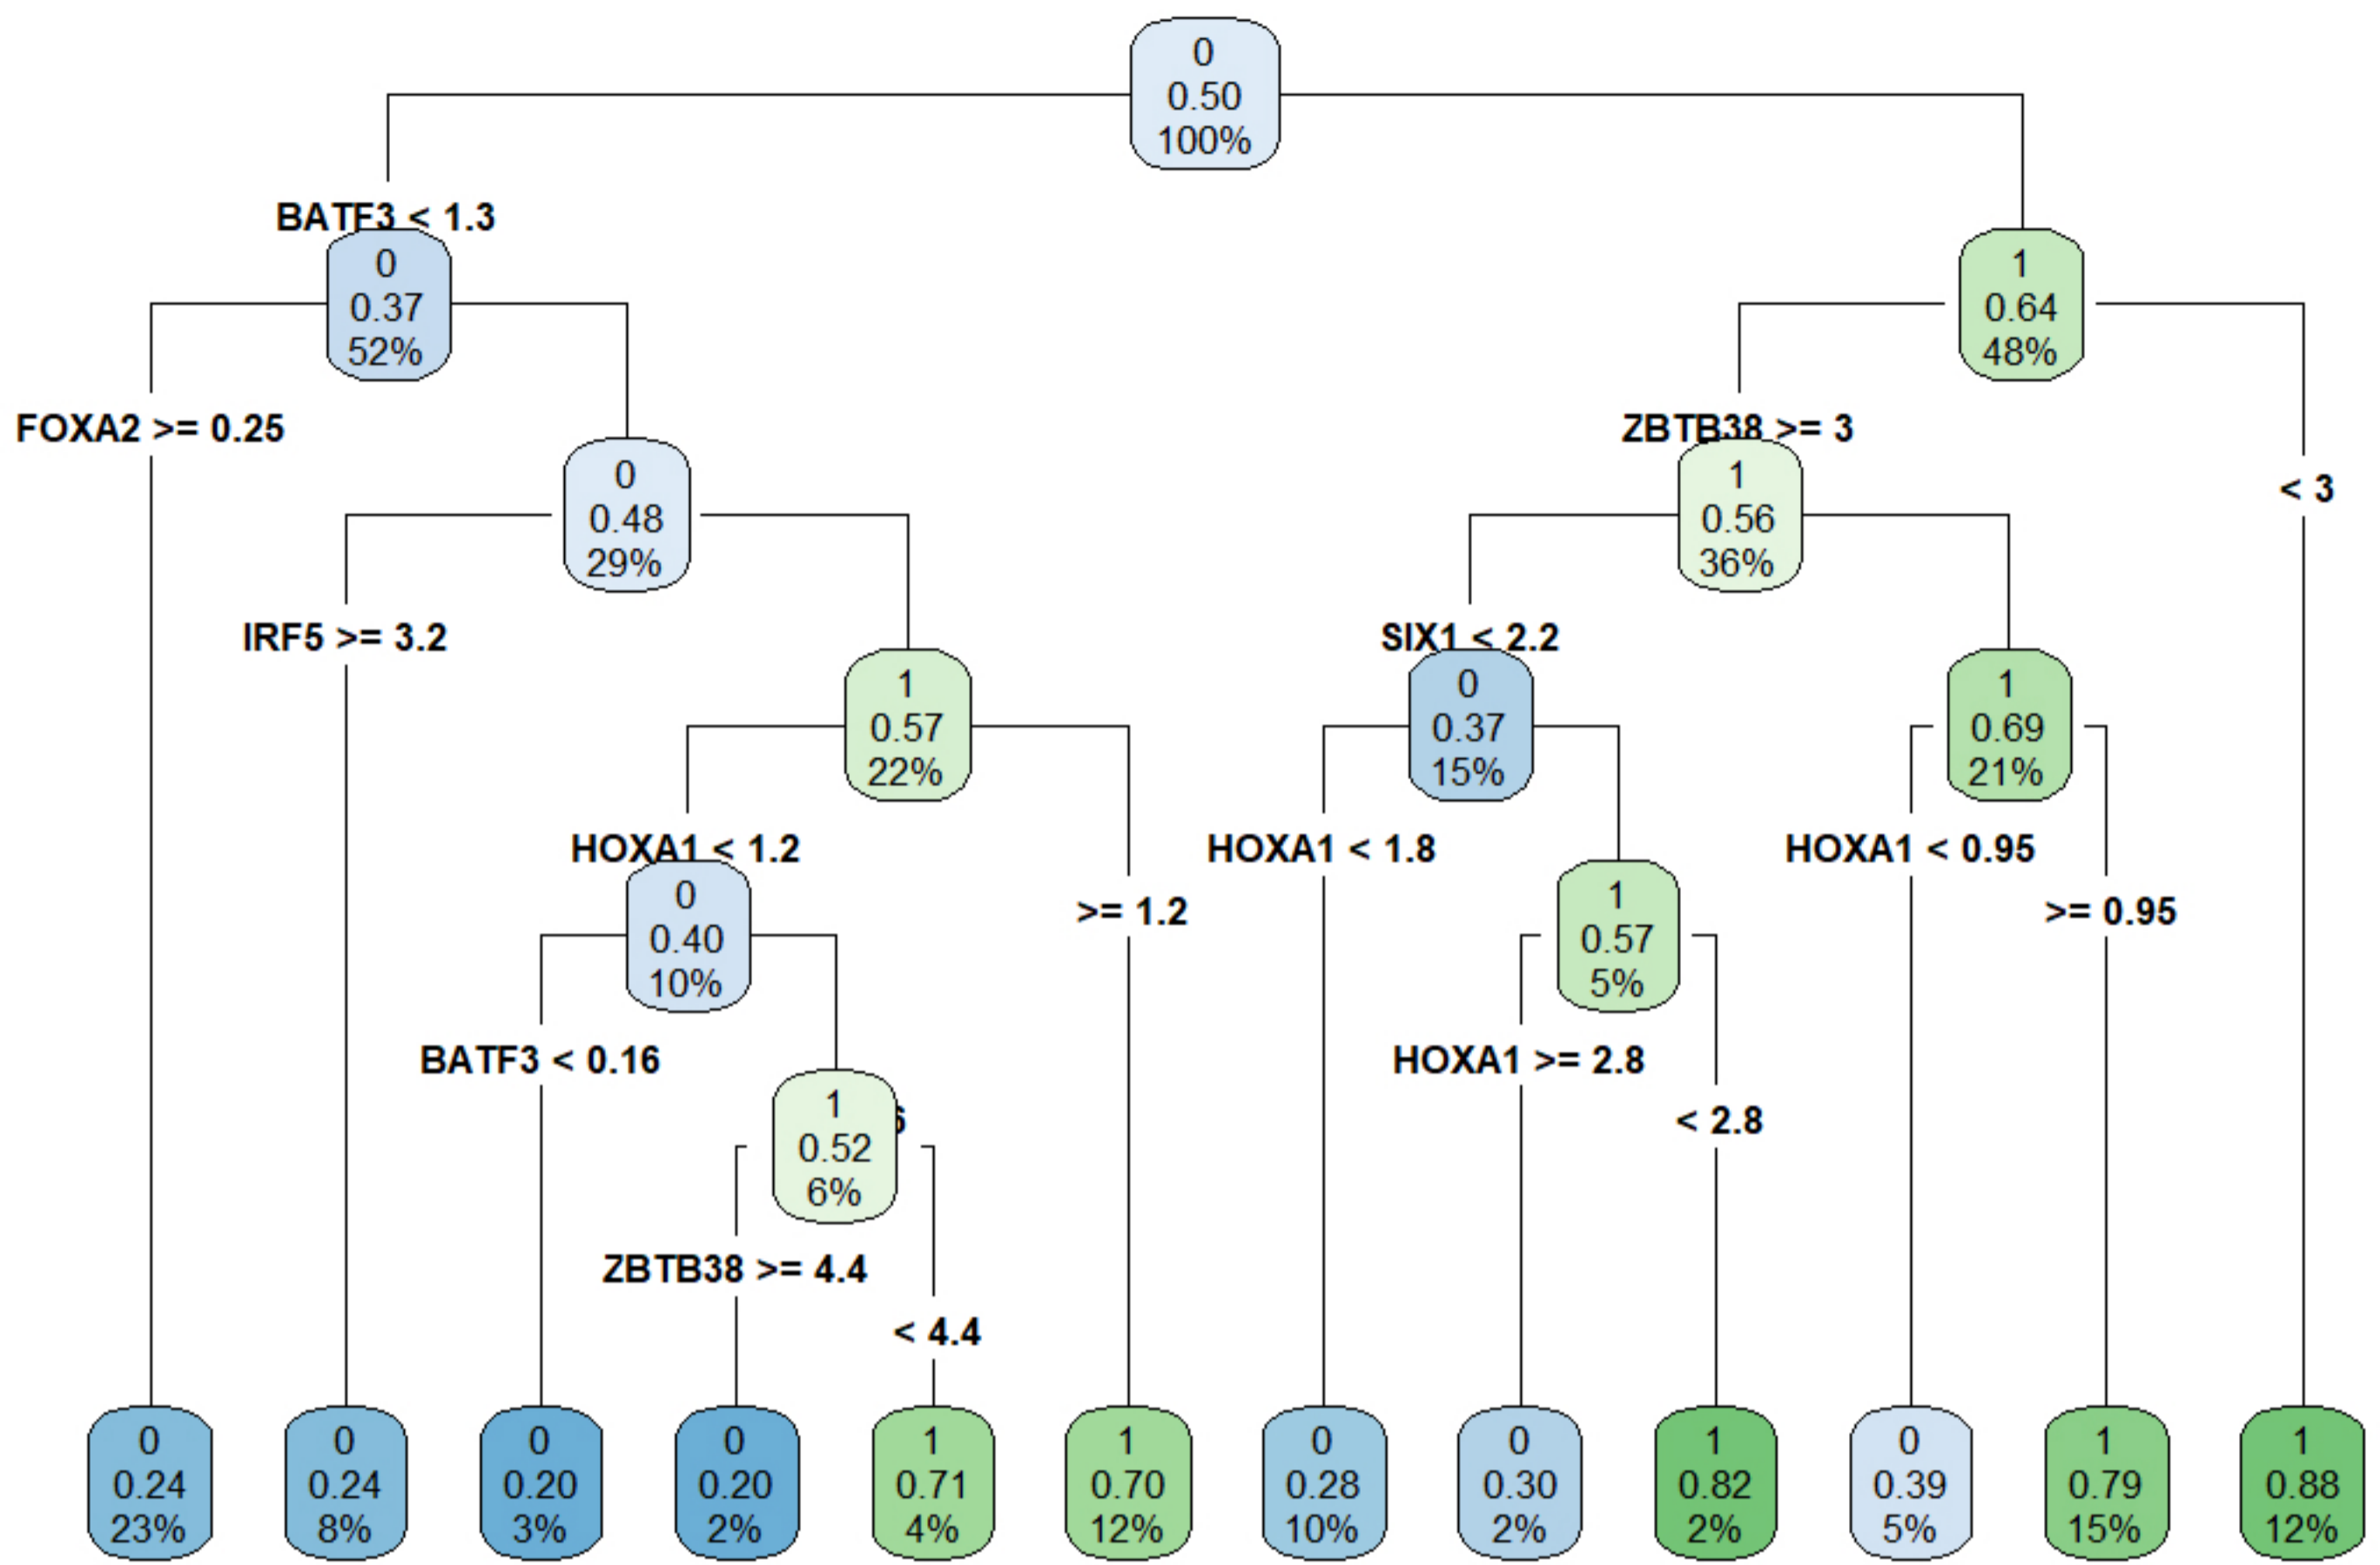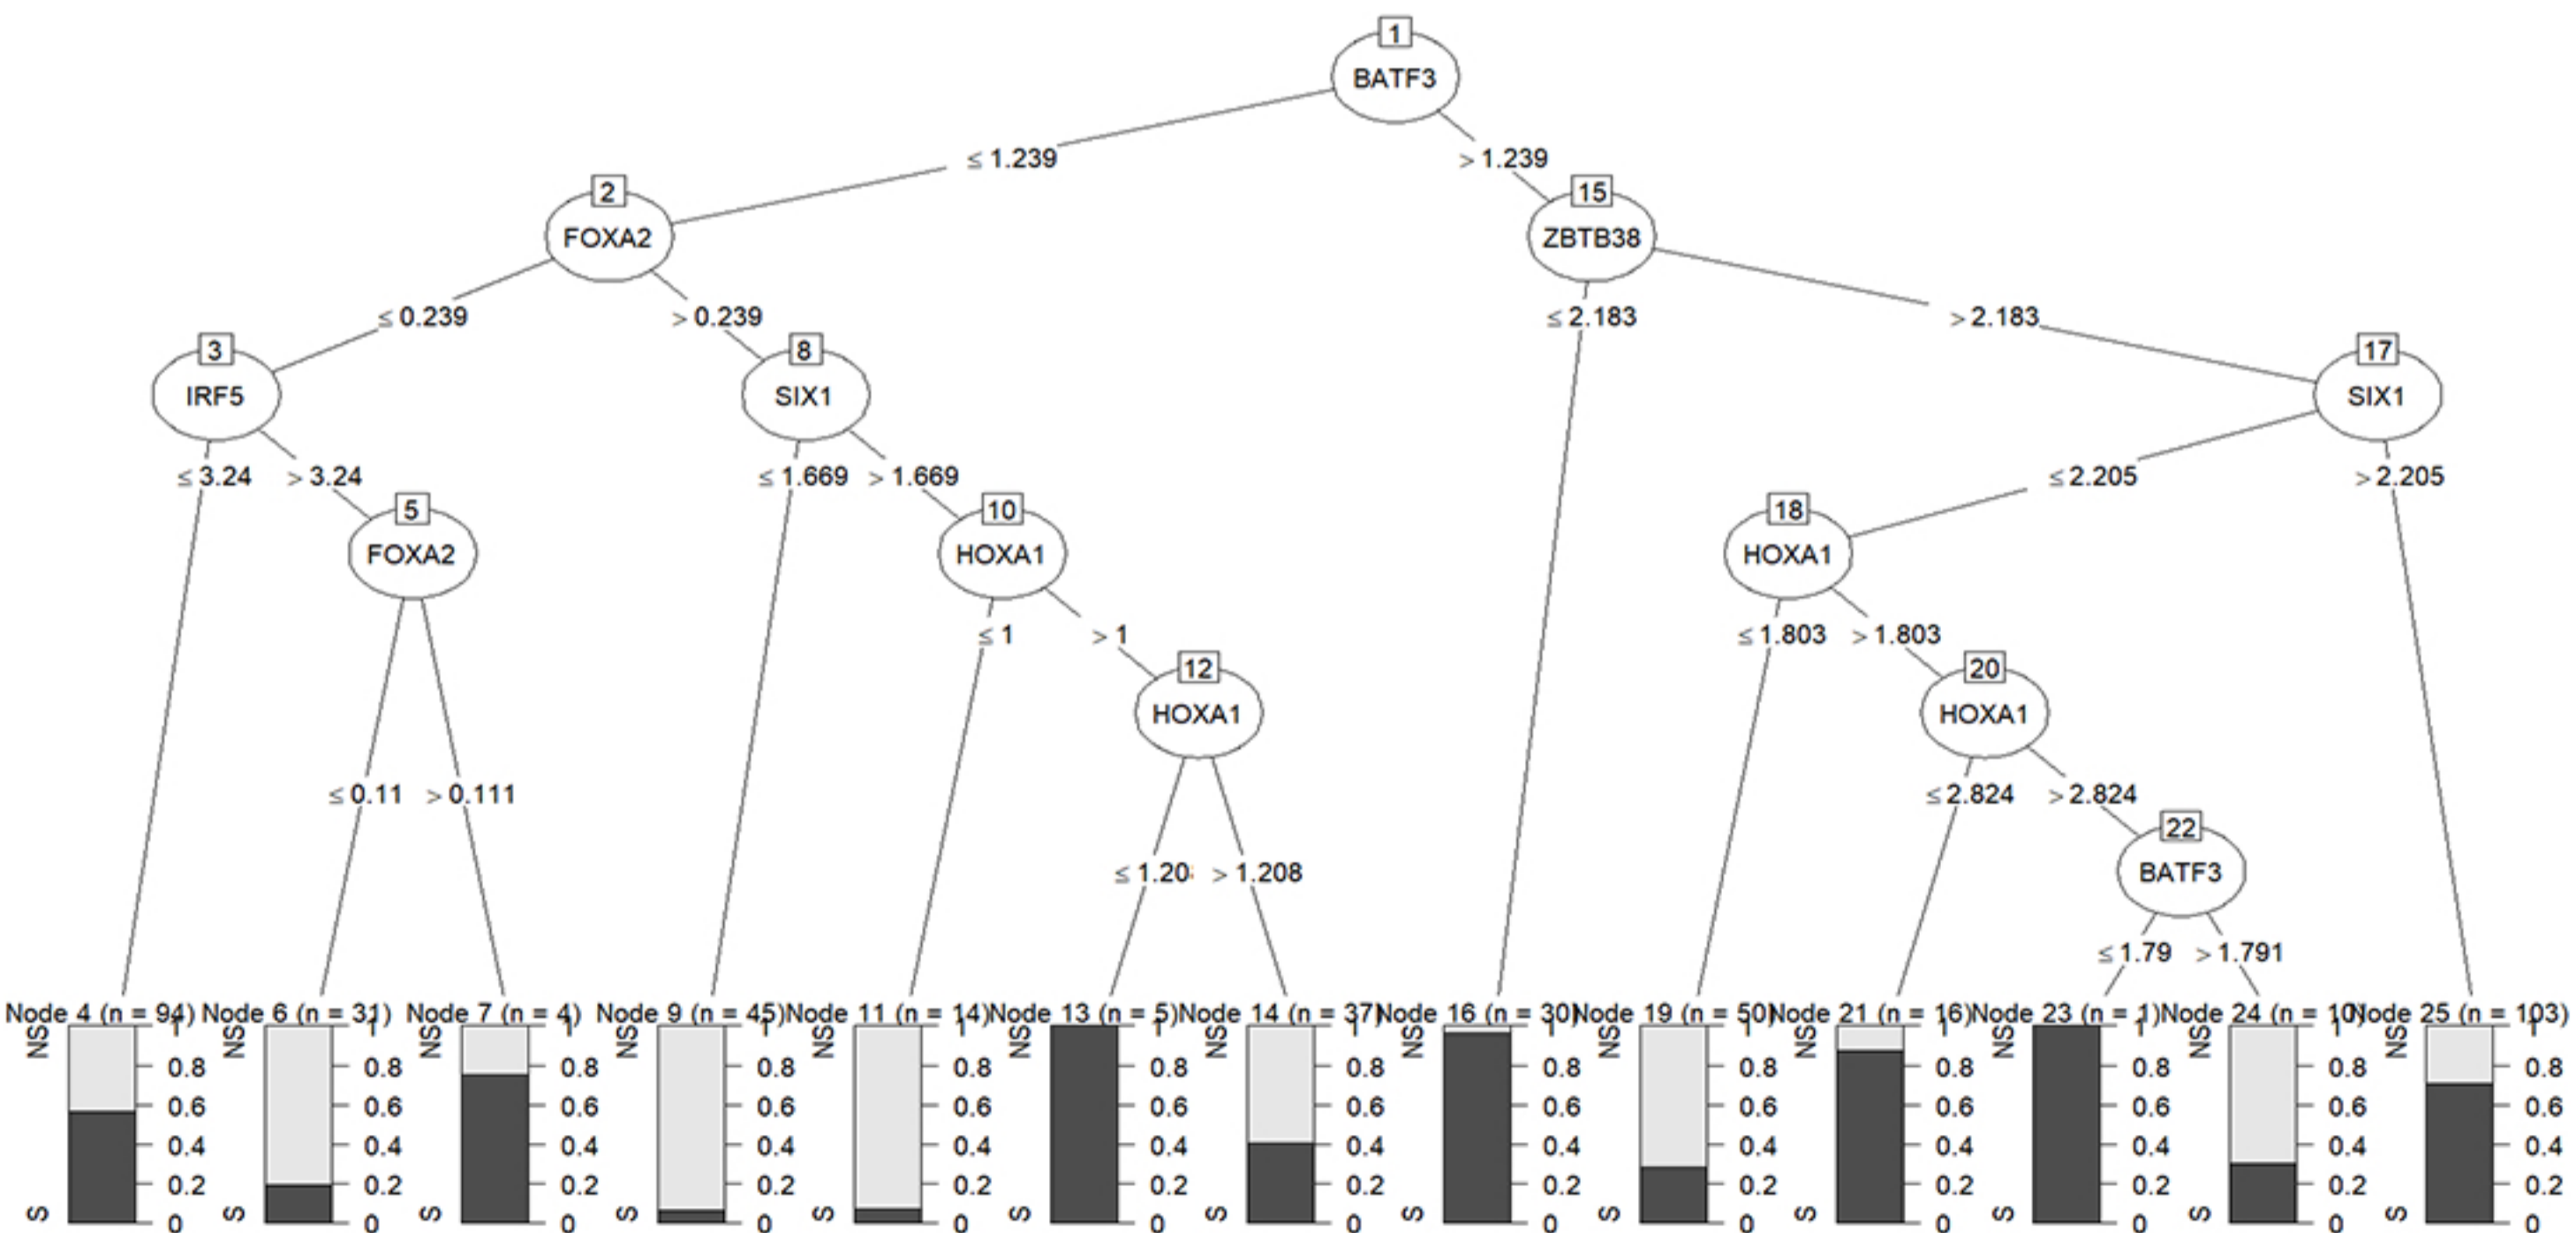

Supplement: MOESM3 [file 20302262]
